# Supplementary material for: A Promising Electrochemical Platform for Dopamine and Uric Acid Detection Based on a Polyaniline/Iron Oxide-Tin Oxide/Reduced Graphene Oxide Ternary Composite
Source: PubMed Central journal article supplement (PMC7763624; doi:10.3390/molecules25245869), 2020-12-11
Supplement: molecules-25-05869-s001.pdf [file molecules-25-05869-s001.pdf]

# A promising electrochemical platform for dopamine and uric acid detection based on a polyaniline/iron oxide-tin oxide/reduced graphene oxide ternary composite

Daria Minta <sup>1</sup>, Adam Moyseowicz <sup>1</sup>, Stanisław Gryglewicz <sup>2</sup>, Grażyna Gryglewicz <sup>1,\*</sup>

<sup>1</sup> Department of Process Engineering and Technology of Polymer and Carbon Materials, Faculty of Chemistry, Wrocław University of Science and Technology, Gdańska 7/9, 50-344 Wrocław, Poland; daria.minta@pwr.edu.pl (D.M.); adam.moyseowicz@pwr.edu.pl (A.M)

<sup>2</sup> Department of Engineering and Technology of Chemical Processes, Faculty of Chemistry, Wrocław University of Science and Technology, Wybrzeże Wyspiańskiego 42, 50-344 Wrocław, Poland; stanislaw.gryglewicz@pwr.edu.pl (S.G.)

\* Correspondence: grazyna.gryglewicz@pwr.edu.pl; Tel.: +48-71-320-6398; Fax: +48-71-320-6506 (G.G.)

## Preparation of graphene oxide

The synthesis of GO was performed using modified Hummers method which was described previously [33]. In brief, in a flask, 2 g of graphite (C-ENERGY KS 6L, TimCal) was mixed with 96 mL of H<sub>2</sub>SO<sub>4</sub> (98 %) and 2g of NaNO<sub>3</sub> (Sigma Aldrich). Next, the reaction mixture was cooled down to 7-9 °C in an ice bath and 12 g of KMnO<sub>4</sub> (Sigma Aldrich) was added under constant stirring. Then the mixture was heated to 35 °C and stirred for 3 hours. After that, 400 mL of H<sub>2</sub>O<sub>2</sub> (3 wt.%, Sigma Aldrich) was introduced to the flask. Finally, the solid product was washed with Milli-Q water until the supernatant reached a neutral pH. The resulting graphite oxide (GrO) was treated with 5 wt.% HCl solution (Sigma Aldrich) and then washed with Milli-Q water. Finally, GrO was exfoliated in a sonication bath for 2 hours to obtain a GO aqueous suspension.

**Table S1.** Optimized DPV parameters for the electrodes electrochemical investigation

| Electrodes | t [s] |    | P <sub>H</sub> [mV] |    | P <sub>w</sub> [ms] |    | S <sub>H</sub> [mV] |    | S <sub>T</sub> [ms] |    |
|------------|-------|----|---------------------|----|---------------------|----|---------------------|----|---------------------|----|
|            | DA    | UA | DA                  | UA | DA                  | UA | DA                  | UA | DA                  | UA |
| GCE/FSG    |       |    |                     |    |                     |    |                     |    | 100                 | 50 |
| GCE/PFSG   | 20    |    | 175                 |    | 25                  |    | 5                   |    | 50                  | 30 |

t – holding time at starting potential

P<sub>H</sub> – pulse amplitude

P<sub>w</sub> – pulse width

S<sub>H</sub> – pulse increment

S<sub>T</sub> – pulse period

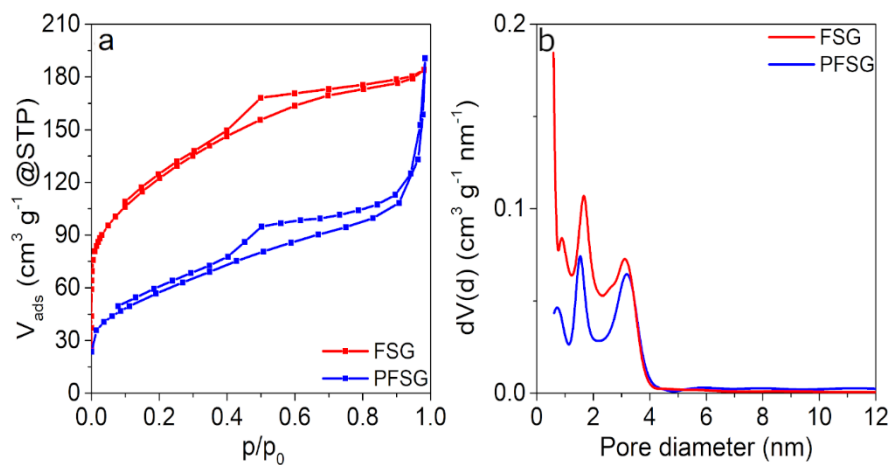

**Figure S1.** Isotherms and pore size distribution for ternary and binary composites.

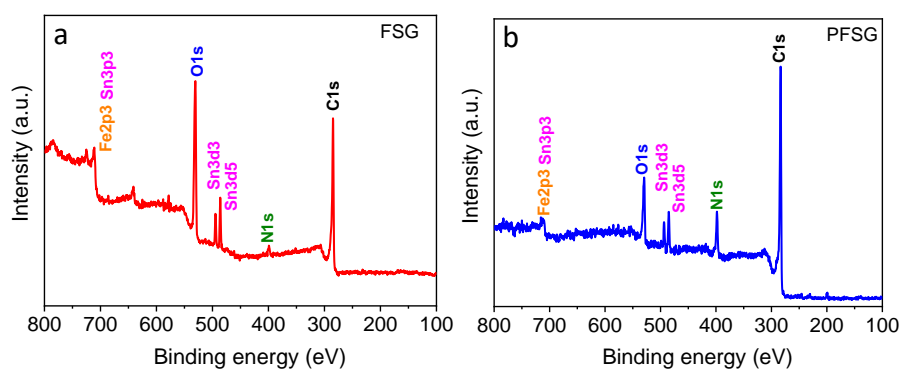

**Figure S2.** XPS survey spectrum of (a) FSG and (b) PFSG composite.

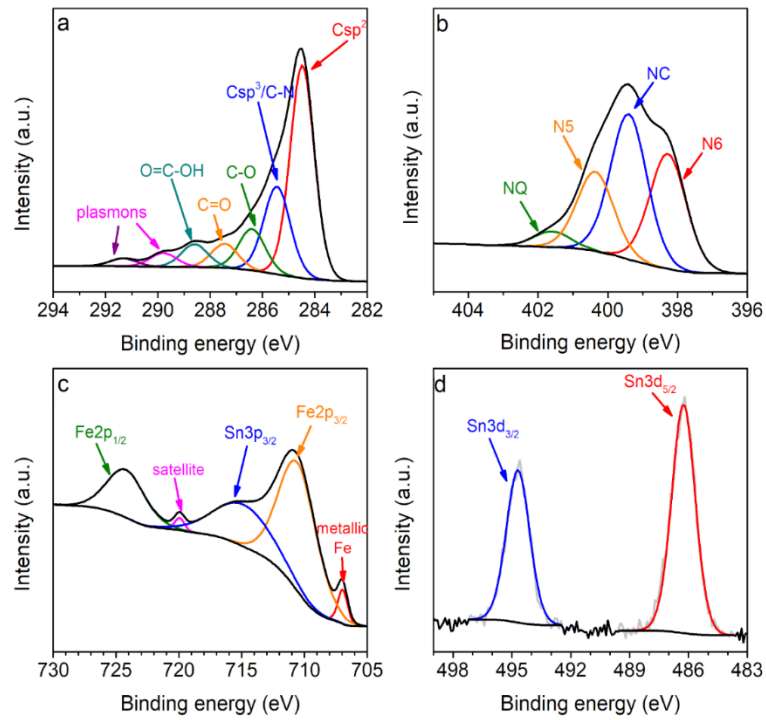

**Figure S3.** Deconvolutions of (a) C1s, (b) N1s, (c) Fe2p and (d) Sn3d for binary composite.

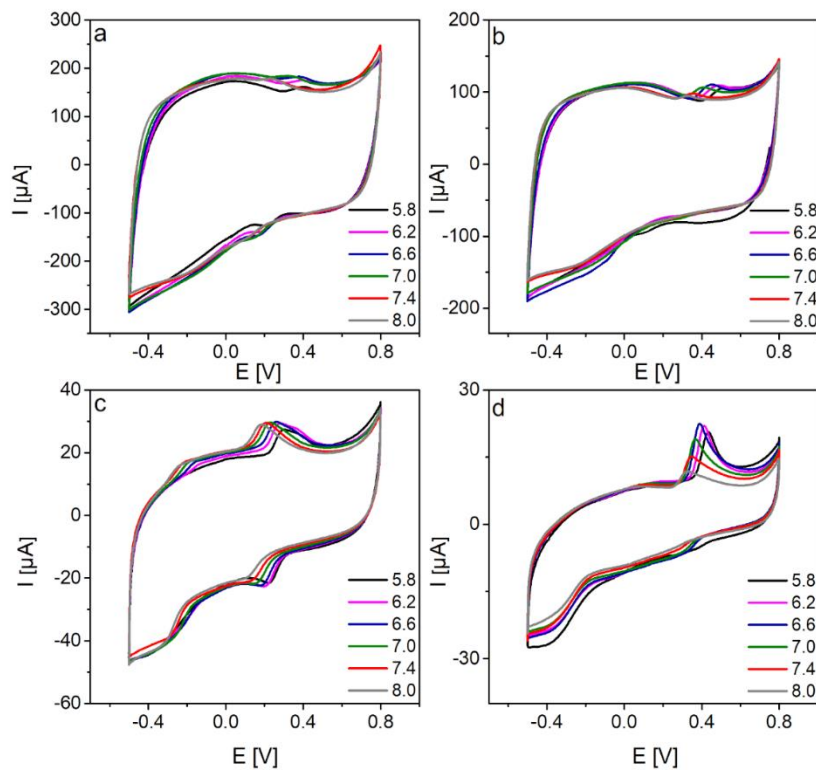

**Figure S4.** CVs recorded on (a,b) GCE/FSG and (c,d) GCE/PFSG electrodes at different pH values in 0.1 M PBS containing (a,c) 100  $\mu\text{M}$  DA and (b,d) 300  $\mu\text{M}$  of UA.

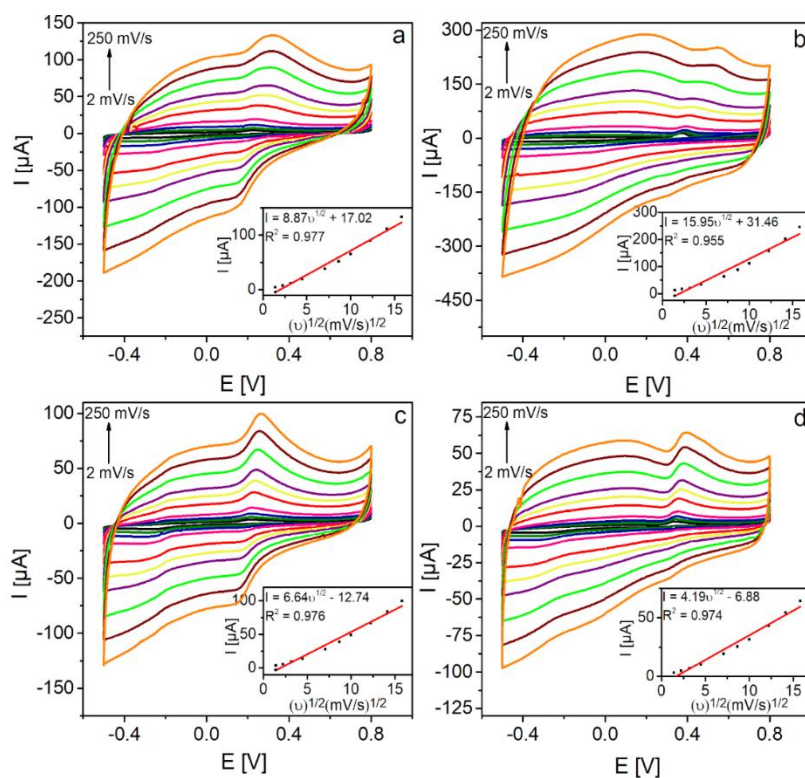

**Figure S5.** CVs recorded on (a,b) GCE/FSG and (c,d) GCE/PFSG electrodes at different scan rates (2, 5, 10, 20, 50, 75, 100, 150, 200, 250 mV/s) in (a,c) 0.1 PBS (pH 7.0) with 100  $\mu\text{M}$  DA and in (b,d) 0.1 PBS (pH 6.6) with 300  $\mu\text{M}$  UA. Insets show dependence of maximum anodic current against the square root of the scan rate.

**Table S2.** Electrochemical performance of GCE/PFSG in DA and UA detection in the presence of interferences.

| Electrodes | LOD [ $\mu\text{M}$ ] |     | Linear range [ $\mu\text{M}$ ] |          | Sensitivity [ $\mu\text{A } \mu\text{M}^{-1}$ ] |     |
|------------|-----------------------|-----|--------------------------------|----------|-------------------------------------------------|-----|
|            | DA                    | UA  | DA                             | UA       | DA                                              | UA  |
| GCE/PFSG   | 1.7                   | 2.5 | 3 – 30, 30 – 100               | 10 – 100 | 3.2, 1.1                                        | 0.3 |
